# Supplementary material
Source: PubMed Central journal article supplement (PMC10468351)
Supplement: BLOODA_ADV-2022-009164-mmc1.pdf [file BLOODA_ADV-2022-009164-mmc1.pdf]

### **Supplementary Information:**

In the initial cohort, 63% of patients received the BNT162b2 vaccine, 33% received mRNA-1273, and 4% received Ad26.COVS. In the booster cohort, 67% of patients had received BNT162b2 for their initial vaccines, 28% mRNA-1273, and 5% Ad26.COVS. Of the 76 patients who received BNT162b2 initially, 75 received BNT162b2 as a booster and 1 received Ad26.COVS. Of the 32 patients who received mRNA-1273 initially, 29 received mRNA-1273 as a booster and 3 received BNT162b2. Of the 6 patients who received Ad26.COVS initially, 3 received Ad26.COVS as a booster and 3 received BNT162b2.

Six patients in the booster cohort underwent heterologous vaccinations and had pre- and post-booster serologic values. Of the 3 patients who initially received Ad26.COVS and subsequently received BNT162b2, 1 maintained a strong serologic response (2660 AU/mL) whereas the other 2 did not respond to either vaccine. Of the 3 patients who originally received mRNA-1273 and then received BNT162b2, 1 maintained a moderate serologic response (529.7 AU/mL) and 1 did not respond to either vaccine. The third patient had no response to mRNA-1273 and a very weak response to BNT162b2 (1.63 AU/mL).

**Supplementary Table 1: Correlation of anti-S levels and neutralization antibody levels**

| Subject | anti-S (AU/mL) | anti-S Interpretation | ND50 heat (cutoff: 20) | ND80 heat (cutoff: 20) | ND Interpretation |
|---------|----------------|-----------------------|------------------------|------------------------|-------------------|
| 1       | < 0.4          | NEG                   | 0                      | 0                      | NEG               |
| 2       | 12.7           | POS                   | 0                      | 0                      | NEG               |
| 3       | 1474           | POS                   | 2212                   | 958                    | POS               |
| 4       | 22.9           | POS                   | 0                      | 0                      | NEG               |
| 5       | 0.5            | NEG                   | 0                      | 0                      | NEG               |
| 6       | 7429           | POS                   | 1357                   | 534                    | POS               |
| 7       | < 0.4          | NEG                   | 0                      | 0                      | NEG               |
| 8       | 11882          | POS                   | 2472                   | 1146                   | POS               |
| 9       | 2784           | POS                   | 2730                   | 758                    | POS               |
| 10      | < 0.4          | NEG                   | 0                      | 0                      | NEG               |
| 11      | < 0.4          | NEG                   | 0                      | 0                      | NEG               |
| 12      | < 0.4          | NEG                   | 0                      | 0                      | NEG               |
| 13      | < 0.4          | NEG                   | 0                      | 0                      | NEG               |
| 14      | 0.4            | NEG                   | 47                     | 0                      | POS               |
| 15      | 16950          | POS                   | 10000                  | 6933                   | POS               |
| 16      | < 0.4          | NEG                   | 0                      | 0                      | NEG               |
| 17      | < 0.4          | NEG                   | 0                      | 0                      | NEG               |
| 18      | 3162           | POS                   | 1210                   | 478                    | POS               |
| 19      | 636.8          | POS                   | 728                    | 218                    | POS               |
| 20      | 84.7           | POS                   | 77                     | 26                     | POS               |

NEG – negative

POS – positive

**Supplementary Table 2: Multivariable analysis for CD8 response to SARS-CoV-2 Variants**

| <b>T-cell, variant, vaccine</b> | <b>Variable</b>           | <b>Direction of association, p-value</b> |
|---------------------------------|---------------------------|------------------------------------------|
| CD8, Wuhan, initial             | Years since diagnosis     | Negative, p=0.007                        |
|                                 | Age                       | Negative, p=0.02                         |
| CD8, Omicron, initial           | Age                       | Negative, p=0.09                         |
|                                 | Female vs. Male           | Female higher response, p=0.09           |
| CD8, Wuhan, booster             | Age                       | Negative, p=0.02                         |
|                                 | Absolute lymphocyte count | Positive, p=0.08                         |
